# Supplementary material
Source: Springer Nature journal article supplement (https://www.springermedizin.de/resource/supplementary/12889_2010_3251_MOESM6_ESM.pdf/9488366)
Supplement: MOESM6 [file 9488366]

**Table 4**

Timeliness (Pd) of HBV infections reported in 2008, as related to the number of report cards received by the MHS.

| Number of report cards per week | Number of MHS | mean Pd [n] | 95% CI       |
|---------------------------------|---------------|-------------|--------------|
| 0                               | 7             | 6.37 [600]  | 5.22- 7.52   |
| <5                              | 17            | 8.28 [737]  | 6.96- 9.65   |
| 5-10                            | 6             | 7.13 [146]  | 4.61- 9.65   |
| 10-20                           | 1             | 19.14 [50]* | 11.32- 26.96 |

\* significant =  $p < 0.05$  compared to the other groups

Pd=period from laboratory diagnosis until notification

n=number of notifications

HBV= hepatitis B virus

MHS= municipal health services
